# Supplementary material for: Can the Energy Gap in the Protein-Ligand Binding Energy Landscape Be Used as a Descriptor in Virtual Ligand Screening?
Source: PLoS One. 2012 Oct 10;7(10):e46532. doi: 10.1371/journal.pone.0046532 (PMC3468575; doi:10.1371/journal.pone.0046532)
Supplement: Table S1 — PDB IDs, Swiss-Prot IDs and performance of 485 X-ray protein conformations included in the Pocketome benchmark. (XLS) [file pone.0046532.s001.xls]

## Sheet: Sheet1
Table S1. PDB IDs, Swiss-Prot IDs and performance of 485 X-ray protein conformations included in the Pocketome benchmark.
PDB ID	Swiss-Prot ID	Holo/Apo	AUC (Best docking score)	AUC (Energy gap)	P value
2bl9	O02604_DRTS_PLAVI_1_238	holo	0.95	0.95	0.0034
2bla	O02604_DRTS_PLAVI_1_238	holo	0.8	0.9	0.00807
2blc	O02604_DRTS_PLAVI_1_238	holo	0.5667	0.85	0.01767
1c9w	O08782_ALD2_CRIGR_2_316	apo	0.8	0.7	0.24372
1frb	O08782_ALD2_CRIGR_2_316	holo	1	0.8	0.14877
1ia8	O14757_CHK1_HUMAN_1_290	holo	0.9237	0.9789	2.0961e-13
1nvq	O14757_CHK1_HUMAN_1_290	holo	0.9395	0.9368	1.90289e-11
1nvr	O14757_CHK1_HUMAN_1_290	holo	0.9289	0.9474	6.38356e-12
1nvs	O14757_CHK1_HUMAN_1_290	holo	0.9	0.9316	3.23939e-11
1zlt	O14757_CHK1_HUMAN_1_290	apo	0.8579	0.8763	6.16722e-09
1zys	O14757_CHK1_HUMAN_1_290	holo	0.8263	0.8158	8.76294e-07
2br1	O14757_CHK1_HUMAN_1_290	holo	0.9237	0.9263	5.53222e-11
2brb	O14757_CHK1_HUMAN_1_290	holo	0.8579	0.8684	1.22884e-08
2brg	O14757_CHK1_HUMAN_1_290	holo	0.9026	0.9079	3.34942e-10
2brh	O14757_CHK1_HUMAN_1_290	holo	0.9079	0.9447	8.38707e-12
2brm	O14757_CHK1_HUMAN_1_290	holo	0.9526	0.9658	8.95506e-13
2c3j	O14757_CHK1_HUMAN_1_290	holo	0.7947	0.8237	4.82031e-07
2c3k	O14757_CHK1_HUMAN_1_290	holo	0.9053	0.9342	2.48469e-11
2c3l	O14757_CHK1_HUMAN_1_290	holo	0.8474	0.8868	2.38729e-09
2cgu	O14757_CHK1_HUMAN_1_290	holo	0.8368	0.8263	3.93763e-07
2cgv	O14757_CHK1_HUMAN_1_290	holo	0.8289	0.8658	1.54159e-08
2hog	O14757_CHK1_HUMAN_1_290	holo	0.85	0.8474	7.2797e-08
2hxl	O14757_CHK1_HUMAN_1_290	holo	0.8711	0.9158	1.55443e-10
2hxq	O14757_CHK1_HUMAN_1_290	holo	0.8158	0.8368	1.71413e-07
2hy0	O14757_CHK1_HUMAN_1_290	holo	0.8842	0.9079	3.34942e-10
1mq4	O14965_STK6_HUMAN_117_400	apo	0.8812	0.9313	1.13987e-05
1ol5	O14965_STK6_HUMAN_117_400	apo	0.8688	0.8938	5.52133e-05
2bmc	O14965_STK6_HUMAN_117_400	apo	0.9938	0.9938	6.1937e-07
2bmc	O14965_STK6_HUMAN_117_400	holo	0.8625	0.9125	2.5421e-05
2c6d	O14965_STK6_HUMAN_117_400	holo	0.8812	0.9125	2.5421e-05
2c6e	O14965_STK6_HUMAN_117_400	holo	0.9	0.9125	2.5421e-05
2c6e	O14965_STK6_HUMAN_117_400	holo	0.9125	0.9062	3.31069e-05
2dwb	O14965_STK6_HUMAN_117_400	holo	0.9	0.9062	3.31069e-05
2j4z	O14965_STK6_HUMAN_117_400	holo	0.8875	0.9188	1.95671e-05
2j4z	O14965_STK6_HUMAN_117_400	holo	0.8938	0.925	1.5008e-05
2np8	O14965_STK6_HUMAN_117_400	holo	0.7438	0.7875	0.00237
1h1w	O15530_PDPK1_HUMAN_63_359	holo	0.7375	0.7625	0.000794444
1oky	O15530_PDPK1_HUMAN_63_359	holo	0.875	0.875	3.2425e-06
1okz	O15530_PDPK1_HUMAN_63_359	holo	0.775	0.7625	0.000794444
1uu3	O15530_PDPK1_HUMAN_63_359	holo	0.9292	0.875	3.2425e-06
1uu7	O15530_PDPK1_HUMAN_63_359	holo	0.9458	0.9083	4.51765e-07
1uu8	O15530_PDPK1_HUMAN_63_359	holo	0.9792	0.9625	1.32196e-08
1uu9	O15530_PDPK1_HUMAN_63_359	holo	0.9292	0.9167	2.69374e-07
1z5m	O15530_PDPK1_HUMAN_63_359	holo	0.7125	0.7458	0.00155
2biy	O15530_PDPK1_HUMAN_63_359	holo	0.8292	0.8125	8.53039e-05
2pe0	O15530_PDPK1_HUMAN_63_359	holo	0.7042	0.6792	0.01557
2pe1	O15530_PDPK1_HUMAN_63_359	holo	0.7458	0.7458	0.00155
2pe2	O15530_PDPK1_HUMAN_63_359	holo	0.7583	0.7417	0.00183
1fp2	O24529_7OMT8_MEDSA_1_352	holo	0.9	0.8	0.14877
1fpx	O24529_7OMT8_MEDSA_1_352	apo	0.95	1	0.04122
1mki	O31465_GLSA1_BACSU_1_327	apo	0.875	0.9	0.02475
1mki	O31465_GLSA1_BACSU_1_327	apo	0.875	0.9	0.02475
2osu	O31465_GLSA1_BACSU_1_327	holo	1	1	0.00704
2osu	O31465_GLSA1_BACSU_1_327	holo	0.825	0.725	0.13463
1qtr	O32449_PIP_SERMA_1_317	holo	0.6833	0.6333	0.21132
1wm1	O32449_PIP_SERMA_1_317	holo	0.5	0.6	0.27377
1x2b	O32449_PIP_SERMA_1_317	apo	0.5167	0.65	0.18349
1x2e	O32449_PIP_SERMA_1_317	holo	0.6	0.55	0.38184
1m7v	O34453_NOSO_BACSU_1_336	holo	0.9071	0.9571	1.33331e-05
1m7z	O34453_NOSO_BACSU_1_336	holo	0.7571	0.8	0.00292
2amo	O34453_NOSO_BACSU_1_336	holo	0.9357	0.95	1.78449e-05
2amo	O34453_NOSO_BACSU_1_336	apo	0.8786	0.9214	5.39471e-05
2an0	O34453_NOSO_BACSU_1_336	apo	0.8643	0.8786	0.000253008
2an2	O34453_NOSO_BACSU_1_336	holo	0.9429	0.8429	0.00081788
2fbz	O34453_NOSO_BACSU_1_336	apo	0.8143	0.8286	0.00127
2fc1	O34453_NOSO_BACSU_1_336	holo	0.8929	0.9857	4.06287e-06
2fc2	O34453_NOSO_BACSU_1_336	holo	0.8786	0.9429	2.36389e-05
2fc2	O34453_NOSO_BACSU_1_336	holo	0.9357	0.8214	0.00157
1ie0	O34667_LUXS_BACSU_1_157	apo	0.77	0.79	0.01218
1j98	O34667_LUXS_BACSU_1_157	apo	0.74	0.81	0.00804
1jqw	O34667_LUXS_BACSU_1_157	holo	0.83	0.86	0.0026
1jvi	O34667_LUXS_BACSU_1_157	holo	0.79	0.79	0.01218
1ycl	O34667_LUXS_BACSU_1_157	holo	0.61	0.6	0.21876
2fqo	O34667_LUXS_BACSU_1_157	holo	0.69	0.83	0.0052
2fqt	O34667_LUXS_BACSU_1_157	holo	0.52	0.58	0.26726
1jcz	O43570_CAH12_HUMAN_29_291	apo	1	0.95	0.01359
1jcz	O43570_CAH12_HUMAN_29_291	apo	1	1	0.00704
1jd0	O43570_CAH12_HUMAN_29_291	holo	1	1	0.00704
1jd0	O43570_CAH12_HUMAN_29_291	holo	1	1	0.00704
1iq8	O58843_ATGT_PYRHO_1_582	apo	0.9	1	0.00704
1iq8	O58843_ATGT_PYRHO_1_582	apo	0.925	0.9	0.02475
1it7	O58843_ATGT_PYRHO_1_582	apo	1	1	0.00704
1it7	O58843_ATGT_PYRHO_1_582	holo	1	1	0.00704
1it8	O58843_ATGT_PYRHO_1_582	holo	1	1	0.00704
1it8	O58843_ATGT_PYRHO_1_582	apo	1	1	0.00704
1iyh	O60760_PTGD2_HUMAN_2_199	apo	0.85	0.825	0.012
1iyh	O60760_PTGD2_HUMAN_2_199	apo	0.7875	0.825	0.012
1iyi	O60760_PTGD2_HUMAN_2_199	apo	0.7875	0.7875	0.02292
1iyi	O60760_PTGD2_HUMAN_2_199	apo	0.575	0.7	0.08243
1v40	O60760_PTGD2_HUMAN_2_199	holo	0.675	0.75	0.04122
1v40	O60760_PTGD2_HUMAN_2_199	holo	0.6	0.65	0.14877
2cvd	O60760_PTGD2_HUMAN_2_199	holo	0.9	0.9125	0.00208
2cvd	O60760_PTGD2_HUMAN_2_199	holo	0.9	0.9375	0.00119
1b37	O64411_PAO_MAIZE_29_500	holo	1	0.9938	6.1937e-07
1b37	O64411_PAO_MAIZE_29_500	holo	1	1	4.55035e-07
1b5q	O64411_PAO_MAIZE_29_500	holo	1	1	4.55035e-07
1b5q	O64411_PAO_MAIZE_29_500	holo	1	1	4.55035e-07
1h81	O64411_PAO_MAIZE_29_500	apo	0.9938	0.9938	6.1937e-07
1h81	O64411_PAO_MAIZE_29_500	apo	0.9	0.9	4.27058e-05
1h82	O64411_PAO_MAIZE_29_500	apo	0.9813	0.9875	8.45988e-07
1h82	O64411_PAO_MAIZE_29_500	apo	0.9938	0.975	1.53941e-06
1h83	O64411_PAO_MAIZE_29_500	holo	1	0.9875	8.45988e-07
1h83	O64411_PAO_MAIZE_29_500	holo	0.9125	0.9313	1.13987e-05
1h84	O64411_PAO_MAIZE_29_500	holo	1	1	4.55035e-07
1h84	O64411_PAO_MAIZE_29_500	holo	1	1	4.55035e-07
1h86	O64411_PAO_MAIZE_29_500	apo	1	1	4.55035e-07
1h86	O64411_PAO_MAIZE_29_500	apo	0.8812	0.95	4.94837e-06
1hqk	O66529_RISB_AQUAE_1_154	holo	0.95	0.95	4.94837e-06
1hqk	O66529_RISB_AQUAE_1_154	holo	0.9875	0.9813	1.14323e-06
1nqu	O66529_RISB_AQUAE_1_154	holo	1	1	4.55035e-07
1nqu	O66529_RISB_AQUAE_1_154	holo	1	0.9875	8.45988e-07
1nqv	O66529_RISB_AQUAE_1_154	holo	0.875	0.9	4.27058e-05
1nqv	O66529_RISB_AQUAE_1_154	holo	0.9313	0.9688	2.07959e-06
1nqw	O66529_RISB_AQUAE_1_154	apo	0.9813	0.9688	2.07959e-06
1nqw	O66529_RISB_AQUAE_1_154	apo	0.975	0.975	1.53941e-06
1nqx	O66529_RISB_AQUAE_1_154	holo	0.9563	0.95	4.94837e-06
1nqx	O66529_RISB_AQUAE_1_154	holo	1	1	4.55035e-07
1ilg	O75469_PXR_HUMAN_131_434	holo	0.6833	0.7667	0.05439
1m13	O75469_PXR_HUMAN_131_434	apo	0.6	0.65	0.18349
1nrl	O75469_PXR_HUMAN_131_434	holo	0.85	0.8333	0.02246
1nrl	O75469_PXR_HUMAN_131_434	holo	0.95	0.9333	0.00458
2ad1	O75897_ST1C4_HUMAN_6_302	holo	0.4	0.4	0.68829
2gwh	O75897_ST1C4_HUMAN_6_302	apo	0.75	0.8	0.07029
2gwh	O75897_ST1C4_HUMAN_6_302	holo	0.8	0.8	0.07029
1rkp	O76074_PDE5A_HUMAN_533_863	holo	0.6091	0.6318	0.06458
1t9r	O76074_PDE5A_HUMAN_533_863	holo	0.4045	0.4455	0.73506
1t9s	O76074_PDE5A_HUMAN_533_863	holo	0.8318	0.8636	1.4103e-05
1t9s	O76074_PDE5A_HUMAN_533_863	holo	0.8273	0.7955	0.000333742
1tbf	O76074_PDE5A_HUMAN_533_863	holo	0.8273	0.8636	1.4103e-05
1udt	O76074_PDE5A_HUMAN_533_863	holo	0.8318	0.8455	3.4722e-05
1uho	O76074_PDE5A_HUMAN_533_863	holo	0.8	0.8182	0.000124043
1xoz	O76074_PDE5A_HUMAN_533_863	apo	0.7	0.6409	0.05239
1xp0	O76074_PDE5A_HUMAN_533_863	apo	0.8409	0.8409	4.32108e-05
2chm	O76074_PDE5A_HUMAN_533_863	holo	0.7364	0.7455	0.00235
2h40	O76074_PDE5A_HUMAN_533_863	holo	0.7136	0.7955	0.000333742
2h42	O76074_PDE5A_HUMAN_533_863	holo	0.85	0.8727	8.84804e-06
2h42	O76074_PDE5A_HUMAN_533_863	holo	0.7818	0.8045	0.000226382
2h44	O76074_PDE5A_HUMAN_533_863	apo	0.45	0.4818	0.58295
1n1b	O81192_BPPS_SALOF_50_598	apo	0.7667	0.8333	0.0002584
1n1b	O81192_BPPS_SALOF_50_598	apo	0.8056	0.85	0.000133259
1n1z	O81192_BPPS_SALOF_50_598	holo	0.9444	1	9.51618e-08
1n1z	O81192_BPPS_SALOF_50_598	holo	0.7222	0.7556	0.00389
1n20	O81192_BPPS_SALOF_50_598	holo	0.9056	0.9722	4.3575e-07
1n20	O81192_BPPS_SALOF_50_598	holo	0.8944	1	9.51618e-08
1n22	O81192_BPPS_SALOF_50_598	holo	0.8056	1	9.51618e-08
1n22	O81192_BPPS_SALOF_50_598	holo	0.8167	0.8278	0.000320187
1n23	O81192_BPPS_SALOF_50_598	apo	0.9	1	9.51618e-08
1n23	O81192_BPPS_SALOF_50_598	holo	0.7889	1	9.51618e-08
1n24	O81192_BPPS_SALOF_50_598	holo	0.9056	1	9.51618e-08
1n24	O81192_BPPS_SALOF_50_598	holo	0.7167	0.9278	4.17151e-06
2bva	O96013_PAK4_HUMAN_293_591	apo	0.8	0.9	0.08243
2bva	O96013_PAK4_HUMAN_293_591	holo	0.5	0.65	0.30123
2cdz	O96013_PAK4_HUMAN_293_591	apo	1	1	0.04122
2j0i	O96013_PAK4_HUMAN_293_591	apo	0.9	0.9	0.08243
2q0n	O96013_PAK4_HUMAN_293_591	apo	1	1	0.04122
1po5	P00178_CP2B4_RABIT_22_491	apo	0.85	0.75	0.19269
1suo	P00178_CP2B4_RABIT_22_491	apo	0.65	0.65	0.30123
2bdm	P00178_CP2B4_RABIT_22_491	holo	1	0.85	0.11214
1n6b	P00179_CP2C5_RABIT_20_487	apo	0.85	0.85	0.11214
1nr6	P00179_CP2C5_RABIT_20_487	holo	0.9	0.9	0.08243
1deh	P00325_ADH1B_HUMAN_2_375	holo	0.985	0.99	3.73116e-08
1deh	P00325_ADH1B_HUMAN_2_375	holo	0.98	0.99	3.73116e-08
1hdx	P00325_ADH1B_HUMAN_2_375	holo	0.94	0.975	9.16019e-08
1hdx	P00325_ADH1B_HUMAN_2_375	holo	0.945	0.965	1.65125e-07
1hdy	P00325_ADH1B_HUMAN_2_375	holo	0.855	0.885	1.18369e-05
1hdy	P00325_ADH1B_HUMAN_2_375	apo	0.865	0.91	3.3747e-06
1hdz	P00325_ADH1B_HUMAN_2_375	apo	1	1	2.00993e-08
1hdz	P00325_ADH1B_HUMAN_2_375	apo	0.9	0.91	3.3747e-06
1hso	P00325_ADH1B_HUMAN_2_375	apo	0.995	0.995	2.74255e-08
1hso	P00325_ADH1B_HUMAN_2_375	apo	0.975	1	2.00993e-08
1hsz	P00325_ADH1B_HUMAN_2_375	apo	0.965	0.975	9.16019e-08
1hsz	P00325_ADH1B_HUMAN_2_375	apo	0.9	0.935	8.94975e-07
1ht0	P00325_ADH1B_HUMAN_2_375	holo	0.98	0.99	3.73116e-08
1ht0	P00325_ADH1B_HUMAN_2_375	holo	0.97	0.99	3.73116e-08
1htb	P00325_ADH1B_HUMAN_2_375	holo	0.94	0.96	2.20724e-07
1htb	P00325_ADH1B_HUMAN_2_375	holo	0.975	0.985	5.02194e-08
1u3t	P00325_ADH1B_HUMAN_2_375	holo	0.96	0.97	1.23168e-07
1u3t	P00325_ADH1B_HUMAN_2_375	apo	1	0.995	2.74255e-08
1u3u	P00325_ADH1B_HUMAN_2_375	apo	0.975	0.98	6.79248e-08
1u3u	P00325_ADH1B_HUMAN_2_375	apo	0.965	0.97	1.23168e-07
1u3v	P00325_ADH1B_HUMAN_2_375	apo	0.985	0.99	3.73116e-08
1u3v	P00325_ADH1B_HUMAN_2_375	apo	0.96	0.965	1.65125e-07
1u3w	P00325_ADH1B_HUMAN_2_375	apo	0.975	0.975	9.16019e-08
1u3w	P00325_ADH1B_HUMAN_2_375	apo	1	1	2.00993e-08
1boz	P00374_DYR_HUMAN_2_187	apo	0.9147	0.9324	3.00797e-10
1dhf	P00374_DYR_HUMAN_2_187	holo	0.8206	0.8441	4.17252e-07
1dhf	P00374_DYR_HUMAN_2_187	holo	0.9118	0.9059	3.10497e-09
1dlr	P00374_DYR_HUMAN_2_187	holo	0.9029	0.9382	1.76566e-10
1dls	P00374_DYR_HUMAN_2_187	holo	0.9176	0.9294	3.93354e-10
1drf	P00374_DYR_HUMAN_2_187	holo	0.8853	0.8765	3.53136e-08
1hfp	P00374_DYR_HUMAN_2_187	holo	0.8088	0.8794	2.78639e-08
1hfq	P00374_DYR_HUMAN_2_187	holo	0.8382	0.9029	3.99718e-09
1hfr	P00374_DYR_HUMAN_2_187	holo	0.9206	0.9235	6.69136e-10
1kms	P00374_DYR_HUMAN_2_187	apo	0.8471	0.8176	2.70648e-06
1kmv	P00374_DYR_HUMAN_2_187	holo	0.8088	0.7853	2.21098e-05
1mvs	P00374_DYR_HUMAN_2_187	holo	0.9412	0.9706	8.0671e-12
1mvt	P00374_DYR_HUMAN_2_187	holo	0.9559	0.9412	1.34316e-10
1ohj	P00374_DYR_HUMAN_2_187	holo	0.9588	0.9824	2.49956e-12
1ohk	P00374_DYR_HUMAN_2_187	holo	0.8765	0.9235	6.69136e-10
1pd8	P00374_DYR_HUMAN_2_187	holo	0.9235	0.9235	6.69136e-10
1pd9	P00374_DYR_HUMAN_2_187	holo	0.9794	0.9853	1.85207e-12
1s3u	P00374_DYR_HUMAN_2_187	apo	0.9265	0.9382	1.76566e-10
1s3v	P00374_DYR_HUMAN_2_187	apo	0.9559	0.9353	2.29614e-10
1s3w	P00374_DYR_HUMAN_2_187	holo	0.9529	0.9765	4.52827e-12
1u71	P00374_DYR_HUMAN_2_187	holo	0.9	0.9353	2.29614e-10
1cia	P00484_CAT3_ECOLX_1_213	apo	0.3333	0.5667	0.34424
1cla	P00484_CAT3_ECOLX_1_213	holo	0.55	0.7	0.11453
1qca	P00484_CAT3_ECOLX_1_213	apo	0.55	0.7	0.11453
2cla	P00484_CAT3_ECOLX_1_213	holo	0.4333	0.65	0.18349
3cla	P00484_CAT3_ECOLX_1_213	holo	0.2833	0.5333	0.42053
4cla	P00484_CAT3_ECOLX_1_213	apo	0.4667	0.6	0.27377
1c50	P00489_PYGM_RABIT_3_843	apo	0.7444	0.7333	0.00753
1c8k	P00489_PYGM_RABIT_3_843	apo	0.7389	0.7611	0.00327
1c8l	P00489_PYGM_RABIT_3_843	holo	0.6167	0.6667	0.04122
1e1y	P00489_PYGM_RABIT_3_843	apo	0.6667	0.7	0.01862
1fu4	P00489_PYGM_RABIT_3_843	apo	0.6389	0.6833	0.02812
1k06	P00489_PYGM_RABIT_3_843	holo	0.7611	0.7833	0.00158
1uzu	P00489_PYGM_RABIT_3_843	apo	0.85	0.8944	1.99299e-05
1wut	P00489_PYGM_RABIT_3_843	apo	0.6722	0.7	0.01862
1wuy	P00489_PYGM_RABIT_3_843	apo	0.6389	0.65	0.05906
1wv0	P00489_PYGM_RABIT_3_843	holo	0.6722	0.7	0.01862
1wv1	P00489_PYGM_RABIT_3_843	apo	0.6778	0.6833	0.02812
1xkx	P00489_PYGM_RABIT_3_843	apo	0.85	0.8944	1.99299e-05
1xl1	P00489_PYGM_RABIT_3_843	apo	0.6556	0.75	0.00461
1z62	P00489_PYGM_RABIT_3_843	holo	0.8	0.8722	5.27084e-05
1z6p	P00489_PYGM_RABIT_3_843	holo	0.7778	0.8833	3.25197e-05
2amv	P00489_PYGM_RABIT_3_843	holo	0.6611	0.6611	0.04661
2gj4	P00489_PYGM_RABIT_3_843	holo	0.8	0.8556	0.000106186
2gm9	P00489_PYGM_RABIT_3_843	apo	0.8056	0.8611	8.43447e-05
2ieg	P00489_PYGM_RABIT_3_843	apo	0.7722	0.8167	0.000486974
2ieg	P00489_PYGM_RABIT_3_843	holo	0.8556	0.9167	7.11696e-06
2iei	P00489_PYGM_RABIT_3_843	holo	0.6722	0.7444	0.00543
2iei	P00489_PYGM_RABIT_3_843	apo	0.8278	0.8833	3.25197e-05
1m73	P00491_PNPH_HUMAN_1_289	holo	0.8833	0.8944	1.99299e-05
1pf7	P00491_PNPH_HUMAN_1_289	holo	0.9	0.95	1.37865e-06
1rr6	P00491_PNPH_HUMAN_1_289	holo	0.7056	0.7833	0.00158
1rsz	P00491_PNPH_HUMAN_1_289	holo	0.75	0.7556	0.00389
1rt9	P00491_PNPH_HUMAN_1_289	holo	0.75	0.7889	0.00131
2a0w	P00491_PNPH_HUMAN_1_289	holo	0.8444	0.9056	1.19866e-05
2a0x	P00491_PNPH_HUMAN_1_289	holo	0.9167	0.9222	5.45751e-06
2a0y	P00491_PNPH_HUMAN_1_289	holo	0.8667	0.8778	4.14675e-05
2oc4	P00491_PNPH_HUMAN_1_289	apo	0.8444	0.8389	0.000207876
2oc9	P00491_PNPH_HUMAN_1_289	holo	0.9611	0.9667	5.84999e-07
2on6	P00491_PNPH_HUMAN_1_289	apo	0.7778	0.8167	0.000486974
1ev4	P00502_GSTA1_RAT_2_222	holo	0.95	0.955	2.92027e-07
1ev4	P00502_GSTA1_RAT_2_222	holo	1	1	2.00993e-08
1ev9	P00502_GSTA1_RAT_2_222	holo	0.83	0.86	3.86328e-05
1ev9	P00502_GSTA1_RAT_2_222	holo	1	1	2.00993e-08
1f3a	P00502_GSTA1_RAT_2_222	holo	0.975	1	2.00993e-08
1f3a	P00502_GSTA1_RAT_2_222	holo	0.98	0.97	1.23168e-07
1f3b	P00502_GSTA1_RAT_2_222	holo	0.9	0.93	1.16734e-06
1f3b	P00502_GSTA1_RAT_2_222	holo	0.925	0.92	1.99646e-06
1ml6	P00502_GSTA1_RAT_2_222	holo	0.99	1	2.00993e-08
1ml6	P00502_GSTA1_RAT_2_222	holo	0.965	1	2.00993e-08
1a07	P00523_SRC_CHICK_142_249	holo	0.8139	0.7806	1.79551e-05
1a07	P00523_SRC_CHICK_142_249	apo	0.8833	0.9278	1.47165e-10
1a08	P00523_SRC_CHICK_142_249	apo	0.8778	0.9056	1.15008e-09
1a08	P00523_SRC_CHICK_142_249	holo	0.9222	0.9306	1.12851e-10
1a09	P00523_SRC_CHICK_142_249	holo	0.9583	0.9639	4.14402e-12
1a09	P00523_SRC_CHICK_142_249	holo	0.925	0.95	1.68033e-11
1a1a	P00523_SRC_CHICK_142_249	holo	0.925	0.9194	3.2316e-10
1a1a	P00523_SRC_CHICK_142_249	holo	0.8417	0.8722	2.09198e-08
1a1b	P00523_SRC_CHICK_142_249	holo	0.9056	0.9306	1.12851e-10
1a1b	P00523_SRC_CHICK_142_249	holo	0.9389	0.9417	3.83851e-11
1a1c	P00523_SRC_CHICK_142_249	holo	0.9306	0.9083	9.01377e-10
1a1c	P00523_SRC_CHICK_142_249	holo	0.95	0.9528	1.28398e-11
1a1e	P00523_SRC_CHICK_142_249	holo	0.9	0.925	1.91598e-10
1a1e	P00523_SRC_CHICK_142_249	holo	0.9028	0.9111	6.99205e-10
1bkl	P00523_SRC_CHICK_142_249	holo	0.8778	0.9306	1.12851e-10
1bkm	P00523_SRC_CHICK_142_249	holo	0.9583	0.9639	4.14402e-12
1f1w	P00523_SRC_CHICK_142_249	holo	0.8194	0.8194	1.26001e-06
1o42	P00523_SRC_CHICK_142_249	holo	0.8667	0.9333	8.63959e-11
1o47	P00523_SRC_CHICK_142_249	apo	0.8361	0.9028	1.47785e-09
1o48	P00523_SRC_CHICK_142_249	apo	0.875	0.8833	8.16574e-09
1o4b	P00523_SRC_CHICK_142_249	apo	0.7278	0.8083	2.78016e-06
1o4f	P00523_SRC_CHICK_142_249	apo	0.7833	0.825	8.45988e-07
1o4g	P00523_SRC_CHICK_142_249	apo	0.8333	0.8278	6.89123e-07
1o4h	P00523_SRC_CHICK_142_249	apo	0.8833	0.8861	6.42803e-09
1o4j	P00523_SRC_CHICK_142_249	apo	0.8167	0.8111	2.28665e-06
1y57	P00523_SRC_CHICK_142_249	holo	0.925	0.925	1.91598e-10
2h8h	P00523_SRC_CHICK_142_249	holo	0.9167	0.9083	9.01377e-10
1fmk	P00523_SRC_CHICK_249_533	holo	0.775	0.7625	0.000794444
1y57	P00523_SRC_CHICK_249_533	holo	0.9458	0.9125	3.50546e-07
1yi6	P00523_SRC_CHICK_249_533	holo	0.9917	0.9667	9.94165e-09
1yi6	P00523_SRC_CHICK_249_533	holo	0.9	0.8792	2.54748e-06
1yoj	P00523_SRC_CHICK_249_533	holo	0.9833	0.95	3.11284e-08
1yoj	P00523_SRC_CHICK_249_533	holo	0.8625	0.775	0.000470083
1yol	P00523_SRC_CHICK_249_533	apo	1	1	9.01377e-10
1yol	P00523_SRC_CHICK_249_533	holo	0.9958	0.9875	2.26838e-09
2bdf	P00523_SRC_CHICK_249_533	apo	0.9042	0.8958	9.60049e-07
2bdf	P00523_SRC_CHICK_249_533	apo	0.9458	0.9625	1.32196e-08
2bdj	P00523_SRC_CHICK_249_533	apo	0.9833	0.9625	1.32196e-08
2h8h	P00523_SRC_CHICK_249_533	apo	0.9542	0.9167	2.69374e-07
2hwo	P00523_SRC_CHICK_249_533	apo	0.975	0.9833	3.05294e-09
2hwo	P00523_SRC_CHICK_249_533	holo	0.8333	0.85	1.27621e-05
2hwp	P00523_SRC_CHICK_249_533	holo	0.8875	0.9167	2.69374e-07
2hwp	P00523_SRC_CHICK_249_533	holo	0.825	0.8083	0.000104423
2oiq	P00523_SRC_CHICK_249_533	holo	0.9167	0.9	7.50305e-07
2oiq	P00523_SRC_CHICK_249_533	holo	0.9375	0.9542	2.33936e-08
2ptk	P00523_SRC_CHICK_249_533	apo	0.9458	0.9667	9.94165e-09
2src	P00523_SRC_CHICK_249_533	apo	0.9417	0.9208	2.08018e-07
1m14	P00533_EGFR_HUMAN_695_1022	holo	0.93	0.93	0.000420466
1m17	P00533_EGFR_HUMAN_695_1022	holo	0.98	0.98	9.70967e-05
1xkk	P00533_EGFR_HUMAN_695_1022	holo	0.69	0.78	0.01487
2gs6	P00533_EGFR_HUMAN_695_1022	apo	0.93	0.93	0.000420466
2gs7	P00533_EGFR_HUMAN_695_1022	apo	0.96	0.95	0.000237456
2gs7	P00533_EGFR_HUMAN_695_1022	holo	0.99	0.97	0.0001318
2itn	P00533_EGFR_HUMAN_695_1022	holo	0.95	0.94	0.000316879
2itv	P00533_EGFR_HUMAN_695_1022	apo	0.92	0.93	0.000420466
1dp0	P00722_BGAL_ECOLI_2_1024	holo	0.475	0.6125	0.04036
1dp0	P00722_BGAL_ECOLI_2_1024	holo	0.455	0.5575	0.18595
1jyn	P00722_BGAL_ECOLI_2_1024	holo	0.465	0.655	0.00804
1jyn	P00722_BGAL_ECOLI_2_1024	holo	0.5225	0.6025	0.05581
1jyv	P00722_BGAL_ECOLI_2_1024	holo	0.5525	0.7	0.000949425
1jyv	P00722_BGAL_ECOLI_2_1024	holo	0.3475	0.4775	0.63663
1jyw	P00722_BGAL_ECOLI_2_1024	holo	0.465	0.5975	0.06493
1jyw	P00722_BGAL_ECOLI_2_1024	holo	0.4625	0.485	0.59209
1jyx	P00722_BGAL_ECOLI_2_1024	holo	0.545	0.825	2.24016e-07
1jyx	P00722_BGAL_ECOLI_2_1024	holo	0.44	0.7	0.000949425
1jz2	P00722_BGAL_ECOLI_2_1024	holo	0.6425	0.66	0.00648
1jz2	P00722_BGAL_ECOLI_2_1024	holo	0.4475	0.565	0.15641
1jz3	P00722_BGAL_ECOLI_2_1024	holo	0.695	0.7425	8.29251e-05
1jz3	P00722_BGAL_ECOLI_2_1024	holo	0.6225	0.695	0.00123
1jz4	P00722_BGAL_ECOLI_2_1024	holo	0.6625	0.75	5.1797e-05
1jz4	P00722_BGAL_ECOLI_2_1024	apo	0.76	0.805	1.08881e-06
1jz5	P00722_BGAL_ECOLI_2_1024	apo	0.42	0.4775	0.63663
1jz5	P00722_BGAL_ECOLI_2_1024	apo	0.4275	0.57	0.13853
1jz6	P00722_BGAL_ECOLI_2_1024	apo	0.44	0.5825	0.10007
1jz6	P00722_BGAL_ECOLI_2_1024	apo	0.5675	0.6675	0.00465
1jz7	P00722_BGAL_ECOLI_2_1024	holo	0.455	0.7225	0.000275224
1jz7	P00722_BGAL_ECOLI_2_1024	holo	0.375	0.4925	0.54636
1jz8	P00722_BGAL_ECOLI_2_1024	holo	0.445	0.63	0.02179
1jz8	P00722_BGAL_ECOLI_2_1024	holo	0.34	0.5825	0.10007
1px3	P00722_BGAL_ECOLI_2_1024	holo	0.6575	0.7075	0.000637433
1px3	P00722_BGAL_ECOLI_2_1024	apo	0.7825	0.84	6.48536e-08
1px4	P00722_BGAL_ECOLI_2_1024	apo	0.53	0.585	0.09344
1px4	P00722_BGAL_ECOLI_2_1024	apo	0.55	0.69	0.00159
1bhx	P00734_THRB_HUMAN_364_622	holo	0.9684	0.9632	1.18938e-12
1d4p	P00734_THRB_HUMAN_364_622	holo	0.9868	0.9816	1.56319e-13
1g32	P00734_THRB_HUMAN_364_622	holo	0.9184	0.95	4.85112e-12
1k22	P00734_THRB_HUMAN_364_622	holo	0.9395	0.9553	2.78866e-12
1ktt	P00734_THRB_HUMAN_364_622	holo	0.9553	0.9526	3.68083e-12
1mu6	P00734_THRB_HUMAN_364_622	holo	0.9526	0.9474	6.38356e-12
1mu8	P00734_THRB_HUMAN_364_622	holo	0.9474	0.9421	1.11096e-11
1mue	P00734_THRB_HUMAN_364_622	holo	0.9526	0.9605	1.57729e-12
1o5g	P00734_THRB_HUMAN_364_622	holo	0.9789	0.9289	4.21685e-11
1qbv	P00734_THRB_HUMAN_364_622	holo	0.9789	0.9763	2.80442e-13
1t4u	P00734_THRB_HUMAN_364_622	holo	0.8763	0.8895	1.87975e-09
1tom	P00734_THRB_HUMAN_364_622	holo	0.9289	0.9605	1.57729e-12
1zgi	P00734_THRB_HUMAN_364_622	holo	0.9342	0.9342	2.48469e-11
2a2x	P00734_THRB_HUMAN_364_622	holo	1	0.9868	8.65974e-14
2bxt	P00734_THRB_HUMAN_364_622	holo	0.9079	0.9395	1.45508e-11
2feq	P00734_THRB_HUMAN_364_622	holo	0.9737	0.9526	3.68083e-12
2fes	P00734_THRB_HUMAN_364_622	holo	0.9579	0.9447	8.38707e-12
2jh0	P00734_THRB_HUMAN_364_622	holo	0.8816	0.8895	1.87975e-09
2jh5	P00734_THRB_HUMAN_364_622	apo	0.9658	0.9763	2.80442e-13
2jh6	P00734_THRB_HUMAN_364_622	holo	0.9526	0.95	4.85112e-12
1avg	P00735_THRB_BOVIN_367_521	apo	0.8444	0.8278	0.000320187
1bbr	P00735_THRB_BOVIN_367_521	holo	1	1	9.51618e-08
1bbr	P00735_THRB_BOVIN_367_521	holo	0.9722	0.9889	1.76609e-07
1etr	P00735_THRB_BOVIN_367_521	holo	0.9333	0.95	1.37865e-06
1ets	P00735_THRB_BOVIN_367_521	holo	0.9389	0.9278	4.17151e-06
1ett	P00735_THRB_BOVIN_367_521	holo	0.9667	0.9944	1.29851e-07
1id5	P00735_THRB_BOVIN_367_521	apo	1	0.9889	1.76609e-07
1mkw	P00735_THRB_BOVIN_367_521	apo	0.8278	0.8833	3.25197e-05
1mkw	P00735_THRB_BOVIN_367_521	apo	1	0.9944	1.29851e-07
1mkx	P00735_THRB_BOVIN_367_521	holo	0.8833	0.9111	9.25112e-06
1mkx	P00735_THRB_BOVIN_367_521	holo	0.9667	0.9889	1.76609e-07
1tbr	P00735_THRB_BOVIN_367_521	holo	0.9444	0.9444	1.82714e-06
1tbr	P00735_THRB_BOVIN_367_521	holo	0.8833	0.9222	5.45751e-06
1ucy	P00735_THRB_BOVIN_367_521	apo	0.9222	0.9222	5.45751e-06
1ucy	P00735_THRB_BOVIN_367_521	apo	1	0.9944	1.29851e-07
1uvt	P00735_THRB_BOVIN_367_521	apo	0.9833	1	9.51618e-08
1ycp	P00735_THRB_BOVIN_367_521	apo	0.95	0.9556	1.04415e-06
1ycp	P00735_THRB_BOVIN_367_521	apo	0.9778	0.9833	2.39423e-07
2hnt	P00735_THRB_BOVIN_367_521	apo	0.9778	0.9667	5.84999e-07
1avg	P00735_THRB_BOVIN_521_625	holo	0.9591	0.9636	4.6819e-08
1bbr	P00735_THRB_BOVIN_521_625	apo	0.9727	0.9773	1.94655e-08
1bbr	P00735_THRB_BOVIN_521_625	holo	0.9955	0.9864	1.06999e-08
1bhx	P00735_THRB_BOVIN_521_625	holo	1	1	4.23877e-09
1etr	P00735_THRB_BOVIN_521_625	holo	0.9773	0.9909	7.83663e-09
1ets	P00735_THRB_BOVIN_521_625	holo	0.9227	0.95	1.09949e-07
1ett	P00735_THRB_BOVIN_521_625	holo	0.9727	0.9773	1.94655e-08
1id5	P00735_THRB_BOVIN_521_625	apo	0.9773	0.9773	1.94655e-08
1mkw	P00735_THRB_BOVIN_521_625	apo	0.9045	0.9364	2.52109e-07
1mkw	P00735_THRB_BOVIN_521_625	apo	1	0.9591	6.23972e-08
1mkx	P00735_THRB_BOVIN_521_625	apo	0.8045	0.8182	0.000124043
1mkx	P00735_THRB_BOVIN_521_625	holo	0.9773	0.9682	3.50368e-08
1riw	P00735_THRB_BOVIN_521_625	holo	0.9364	0.95	1.09949e-07
1tbr	P00735_THRB_BOVIN_521_625	holo	0.9182	0.9182	7.34537e-07
1tbr	P00735_THRB_BOVIN_521_625	holo	0.9682	0.9455	1.4537e-07
1ucy	P00735_THRB_BOVIN_521_625	apo	0.9364	0.9409	1.91694e-07
1ucy	P00735_THRB_BOVIN_521_625	holo	0.9409	0.9636	4.6819e-08
1uvt	P00735_THRB_BOVIN_521_625	apo	0.9591	0.9818	1.44511e-08
1ycp	P00735_THRB_BOVIN_521_625	apo	0.9818	0.9818	1.44511e-08
1ycp	P00735_THRB_BOVIN_521_625	apo	0.9364	0.8909	3.3747e-06
2hnt	P00735_THRB_BOVIN_521_625	apo	0.9364	0.9409	1.91694e-07
1f0r	P00742_FA10_HUMAN_127_476	holo	0.9778	0.9556	9.70168e-12
1f0s	P00742_FA10_HUMAN_127_476	holo	0.8722	0.9278	1.47165e-10
1iqm	P00742_FA10_HUMAN_127_476	holo	0.8778	0.8972	2.42825e-09
1lpk	P00742_FA10_HUMAN_127_476	holo	0.9472	0.9944	1.62981e-13
1lpz	P00742_FA10_HUMAN_127_476	holo	0.975	1	8.83738e-14
1nfu	P00742_FA10_HUMAN_127_476	holo	0.975	0.9944	1.62981e-13
1nfw	P00742_FA10_HUMAN_127_476	holo	0.925	0.9083	9.01377e-10
1nfy	P00742_FA10_HUMAN_127_476	holo	0.9417	0.9639	4.14402e-12
1xka	P00742_FA10_HUMAN_127_476	holo	0.8972	0.925	1.91598e-10
2bok	P00742_FA10_HUMAN_127_476	holo	0.9889	0.9944	1.62981e-13
2cji	P00742_FA10_HUMAN_127_476	holo	0.9806	0.9667	3.11062e-12
2d1j	P00742_FA10_HUMAN_127_476	holo	0.8694	0.8833	8.16574e-09
2j2u	P00742_FA10_HUMAN_127_476	apo	0.9583	0.9611	5.51159e-12
2j34	P00742_FA10_HUMAN_127_476	holo	1	1	8.83738e-14
2j38	P00742_FA10_HUMAN_127_476	holo	0.9778	0.9861	3.98792e-13
2j94	P00742_FA10_HUMAN_127_476	holo	0.9889	0.9722	1.74394e-12
2j95	P00742_FA10_HUMAN_127_476	holo	0.9944	0.9778	9.71334e-13
2uwl	P00742_FA10_HUMAN_127_476	apo	0.975	0.9667	3.11062e-12
2uwo	P00742_FA10_HUMAN_127_476	holo	0.95	0.9444	2.91938e-11
2uwp	P00742_FA10_HUMAN_127_476	holo	0.9861	0.9611	5.51159e-12
1ejn	P00749_UROK_HUMAN_176_427	holo	0.9184	0.9316	3.23939e-11
1gi7	P00749_UROK_HUMAN_176_427	holo	0.9868	0.9474	6.38356e-12
1gi8	P00749_UROK_HUMAN_176_427	holo	0.9842	0.9395	1.45508e-11
1gi9	P00749_UROK_HUMAN_176_427	holo	0.9895	0.9684	6.73239e-13
1gj7	P00749_UROK_HUMAN_176_427	holo	1	0.9816	1.56319e-13
1gj8	P00749_UROK_HUMAN_176_427	holo	0.9763	0.9474	6.38356e-12
1gj9	P00749_UROK_HUMAN_176_427	holo	1	0.9868	8.65974e-14
1gjb	P00749_UROK_HUMAN_176_427	holo	0.9842	0.9579	2.10942e-12
1gjd	P00749_UROK_HUMAN_176_427	holo	0.9921	0.9842	1.16351e-13
1o3p	P00749_UROK_HUMAN_176_427	holo	0.9974	0.9763	2.80442e-13
1o5a	P00749_UROK_HUMAN_176_427	holo	1	0.9868	8.65974e-14
1o5c	P00749_UROK_HUMAN_176_427	holo	0.9711	0.9711	5.05374e-13
1owd	P00749_UROK_HUMAN_176_427	holo	0.9763	0.9237	7.17906e-11
1owe	P00749_UROK_HUMAN_176_427	holo	0.9789	0.9579	2.10942e-12
1owh	P00749_UROK_HUMAN_176_427	apo	0.9789	0.9605	1.57729e-12
1sc8	P00749_UROK_HUMAN_176_427	holo	0.9895	0.9789	2.0961e-13
1sqa	P00749_UROK_HUMAN_176_427	holo	0.9816	0.9789	2.0961e-13
1sqo	P00749_UROK_HUMAN_176_427	holo	0.9868	0.9711	5.05374e-13
1sqt	P00749_UROK_HUMAN_176_427	holo	0.9974	0.9789	2.0961e-13
1u6q	P00749_UROK_HUMAN_176_427	holo	0.9921	0.9789	2.0961e-13
1az8	P00760_TRY1_BOVIN_63_243	holo	1	1	4.07008e-13
1bjv	P00760_TRY1_BOVIN_63_243	holo	1	0.9971	5.54223e-13
1f0t	P00760_TRY1_BOVIN_63_243	holo	1	1	4.07008e-13
1f0u	P00760_TRY1_BOVIN_63_243	apo	1	0.9853	1.85207e-12
1g36	P00760_TRY1_BOVIN_63_243	apo	0.9941	0.9912	1.02185e-12
1gj6	P00760_TRY1_BOVIN_63_243	apo	1	1	4.07008e-13
1k1l	P00760_TRY1_BOVIN_63_243	holo	1	1	4.07008e-13
1k1p	P00760_TRY1_BOVIN_63_243	holo	1	1	4.07008e-13
1mtw	P00760_TRY1_BOVIN_63_243	holo	1	1	4.07008e-13
1o2r	P00760_TRY1_BOVIN_63_243	holo	0.9941	0.9824	2.49956e-12
1o2t	P00760_TRY1_BOVIN_63_243	holo	1	0.9794	3.36731e-12
1o2u	P00760_TRY1_BOVIN_63_243	holo	1	0.9912	1.02185e-12
1qb6	P00760_TRY1_BOVIN_63_243	holo	1	0.9971	5.54223e-13
1qbn	P00760_TRY1_BOVIN_63_243	holo	1	0.9971	5.54223e-13
1v2n	P00760_TRY1_BOVIN_63_243	holo	1	1	4.07008e-13
1v2o	P00760_TRY1_BOVIN_63_243	holo	1	0.9971	5.54223e-13
1y59	P00760_TRY1_BOVIN_63_243	holo	1	0.9824	2.49956e-12
1y5a	P00760_TRY1_BOVIN_63_243	holo	1	0.9647	1.44116e-11
1y5b	P00760_TRY1_BOVIN_63_243	holo	1	0.9971	5.54223e-13
1y5u	P00760_TRY1_BOVIN_63_243	holo	0.9971	0.9941	7.53175e-13
1amh	P00763_TRY2_RAT_23_246	apo	0.7	0.715	0.00913
1amh	P00763_TRY2_RAT_23_246	apo	0.595	0.64	0.06212
1anc	P00763_TRY2_RAT_23_246	holo	0.97	0.975	9.16019e-08
1and	P00763_TRY2_RAT_23_246	holo	0.92	0.94	6.79404e-07
1ane	P00763_TRY2_RAT_23_246	holo	0.905	0.95	3.88092e-07
1bra	P00763_TRY2_RAT_23_246	holo	0.96	0.955	2.92027e-07
1brb	P00763_TRY2_RAT_23_246	holo	0.535	0.56	0.25503
1brc	P00763_TRY2_RAT_23_246	apo	0.915	0.925	1.52885e-06
1co7	P00763_TRY2_RAT_23_246	apo	0.82	0.9	5.60151e-06
1dpo	P00763_TRY2_RAT_23_246	apo	0.98	0.975	9.16019e-08
1ezs	P00763_TRY2_RAT_23_246	holo	0.63	0.655	0.04444
1ezs	P00763_TRY2_RAT_23_246	holo	0.685	0.665	0.03502
1ezu	P00763_TRY2_RAT_23_246	holo	0.515	0.465	0.6496
1ezu	P00763_TRY2_RAT_23_246	holo	0.78	0.865	3.0633e-05
1f5r	P00763_TRY2_RAT_23_246	holo	0.69	0.635	0.06916
1f7z	P00763_TRY2_RAT_23_246	apo	0.94	0.92	1.99646e-06
1fy8	P00763_TRY2_RAT_23_246	apo	0.81	0.745	0.00357
1j14	P00763_TRY2_RAT_23_246	apo	0.83	0.795	0.000600697
1j15	P00763_TRY2_RAT_23_246	apo	0.965	0.965	1.65125e-07
1j16	P00763_TRY2_RAT_23_246	apo	0.94	0.935	8.94975e-07
1j17	P00763_TRY2_RAT_23_246	apo	1	0.985	5.02194e-08
1k9o	P00763_TRY2_RAT_23_246	apo	0.815	0.955	2.92027e-07
1ql9	P00763_TRY2_RAT_23_246	apo	1	1	2.00993e-08
2chl	Q9Y6M4_KC1G3_HUMAN_33_362	holo	0.9	0.95	0.000237456
2izr	Q9Y6M4_KC1G3_HUMAN_33_362	holo	0.85	0.87	0.00204
2izs	Q9Y6M4_KC1G3_HUMAN_33_362	holo	0.97	0.97	0.0001318
2izt	Q9Y6M4_KC1G3_HUMAN_33_362	holo	0.98	0.96	0.000177886
2izu	Q9Y6M4_KC1G3_HUMAN_33_362	holo	0.96	0.98	9.70967e-05
