# Supplementary material for: Can the Energy Gap in the Protein-Ligand Binding Energy Landscape Be Used as a Descriptor in Virtual Ligand Screening?
Source: PLoS One. 2012 Oct 10;7(10):e46532. doi: 10.1371/journal.pone.0046532 (PMC3468575; doi:10.1371/journal.pone.0046532)
Supplement: Table S3 — PDB IDs, Swiss-Prot IDs and performance of 151 apo X-ray protein conformations included in the Pocketome benchmark. (XLS) [file pone.0046532.s003.xls]

## Sheet: Sheet1
Table S3. PDB IDs, Swiss-Prot IDs and performance of 151 apo X-ray protein conformations included in the Pocketome benchmark.
PDB ID	Swiss-Prot ID	AUC (Best docking score)	AUC (Energy gap)
1c9w	O08782_ALD2_CRIGR_2_316	0.8	0.7
1ia8	O14757_CHK1_HUMAN_1_290	0.9237	0.9789
1mq4	O14965_STK6_HUMAN_117_400	0.8812	0.9313
1ol5	O14965_STK6_HUMAN_117_400	0.8688	0.8938
2c6d	O14965_STK6_HUMAN_117_400	0.8812	0.9125
1fpx	O24529_7OMT8_MEDSA_1_352	0.95	1
1mki	O31465_GLSA1_BACSU_1_327	0.875	0.9
1mki	O31465_GLSA1_BACSU_1_327	0.875	0.9
1qtr	O32449_PIP_SERMA_1_317	0.6833	0.6333
2amo	O34453_NOSO_BACSU_1_336	0.9357	0.95
2amo	O34453_NOSO_BACSU_1_336	0.8786	0.9214
2an0	O34453_NOSO_BACSU_1_336	0.8643	0.8786
1ie0	O34667_LUXS_BACSU_1_157	0.77	0.79
1j98	O34667_LUXS_BACSU_1_157	0.74	0.81
1jcz	O43570_CAH12_HUMAN_29_291	1	0.95
1jcz	O43570_CAH12_HUMAN_29_291	1	1
1it8	O58843_ATGT_PYRHO_1_582	1	1
1iq8	O58843_ATGT_PYRHO_1_582	0.9	1
1iq8	O58843_ATGT_PYRHO_1_582	0.925	0.9
1it7	O58843_ATGT_PYRHO_1_582	1	1
1iyh	O60760_PTGD2_HUMAN_2_199	0.85	0.825
1iyh	O60760_PTGD2_HUMAN_2_199	0.7875	0.825
1iyi	O60760_PTGD2_HUMAN_2_199	0.7875	0.7875
1iyi	O60760_PTGD2_HUMAN_2_199	0.575	0.7
1b5q	O64411_PAO_MAIZE_29_500	1	1
1b5q	O64411_PAO_MAIZE_29_500	1	1
1h82	O64411_PAO_MAIZE_29_500	0.9813	0.9875
1h82	O64411_PAO_MAIZE_29_500	0.9938	0.975
1h86	O64411_PAO_MAIZE_29_500	1	1
1h86	O64411_PAO_MAIZE_29_500	0.8812	0.95
1hqk	O66529_RISB_AQUAE_1_154	0.95	0.95
1hqk	O66529_RISB_AQUAE_1_154	0.9875	0.9813
1ilg	O75469_PXR_HUMAN_131_434	0.6833	0.7667
2ad1	O75897_ST1C4_HUMAN_6_302	0.4	0.4
1t9r	O76074_PDE5A_HUMAN_533_863	0.4045	0.4455
2h40	O76074_PDE5A_HUMAN_533_863	0.7136	0.7955
2h44	O76074_PDE5A_HUMAN_533_863	0.45	0.4818
1n1b	O81192_BPPS_SALOF_50_598	0.7667	0.8333
1n1b	O81192_BPPS_SALOF_50_598	0.8056	0.85
1n22	O81192_BPPS_SALOF_50_598	0.8167	0.8278
2bva	O96013_PAK4_HUMAN_293_591	0.8	0.9
2bva	O96013_PAK4_HUMAN_293_591	0.5	0.65
2j0i	O96013_PAK4_HUMAN_293_591	0.9	0.9
2q0n	O96013_PAK4_HUMAN_293_591	1	1
1suo	P00178_CP2B4_RABIT_22_491	0.65	0.65
1po5	P00178_CP2B4_RABIT_22_491	0.85	0.75
1n6b	P00179_CP2C5_RABIT_20_487	0.85	0.85
1u3t	P00325_ADH1B_HUMAN_2_375	0.96	0.97
1u3t	P00325_ADH1B_HUMAN_2_375	1	0.995
1deh	P00325_ADH1B_HUMAN_2_375	0.98	0.99
1hdx	P00325_ADH1B_HUMAN_2_375	0.94	0.975
1hdx	P00325_ADH1B_HUMAN_2_375	0.945	0.965
1hdy	P00325_ADH1B_HUMAN_2_375	0.855	0.885
1hdy	P00325_ADH1B_HUMAN_2_375	0.865	0.91
1htb	P00325_ADH1B_HUMAN_2_375	0.975	0.985
1u3u	P00325_ADH1B_HUMAN_2_375	0.975	0.98
1u3u	P00325_ADH1B_HUMAN_2_375	0.965	0.97
1u3v	P00325_ADH1B_HUMAN_2_375	0.985	0.99
1u3v	P00325_ADH1B_HUMAN_2_375	0.96	0.965
1u3w	P00325_ADH1B_HUMAN_2_375	0.975	0.975
1u3w	P00325_ADH1B_HUMAN_2_375	1	1
1s3w	P00374_DYR_HUMAN_2_187	0.9529	0.9765
1u71	P00374_DYR_HUMAN_2_187	0.9	0.9353
1ohj	P00374_DYR_HUMAN_2_187	0.9588	0.9824
1ohk	P00374_DYR_HUMAN_2_187	0.8765	0.9235
1cla	P00484_CAT3_ECOLX_1_213	0.55	0.7
1cia	P00484_CAT3_ECOLX_1_213	0.3333	0.5667
2cla	P00484_CAT3_ECOLX_1_213	0.4333	0.65
1wut	P00489_PYGM_RABIT_3_843	0.6722	0.7
1wv0	P00489_PYGM_RABIT_3_843	0.6722	0.7
1wv1	P00489_PYGM_RABIT_3_843	0.6778	0.6833
1z6p	P00489_PYGM_RABIT_3_843	0.7778	0.8833
1c8k	P00489_PYGM_RABIT_3_843	0.7389	0.7611
1c8l	P00489_PYGM_RABIT_3_843	0.6167	0.6667
1e1y	P00489_PYGM_RABIT_3_843	0.6667	0.7
1wuy	P00489_PYGM_RABIT_3_843	0.6389	0.65
2amv	P00489_PYGM_RABIT_3_843	0.6611	0.6611
1z62	P00489_PYGM_RABIT_3_843	0.8	0.8722
1uzu	P00489_PYGM_RABIT_3_843	0.85	0.8944
1fu4	P00489_PYGM_RABIT_3_843	0.6389	0.6833
1xl1	P00489_PYGM_RABIT_3_843	0.6556	0.75
1m73	P00491_PNPH_HUMAN_1_289	0.8833	0.8944
2on6	P00491_PNPH_HUMAN_1_289	0.7778	0.8167
1y57	P00523_SRC_CHICK_142_249	0.925	0.925
2h8h	P00523_SRC_CHICK_142_249	0.9167	0.9083
1o48	P00523_SRC_CHICK_142_249	0.875	0.8833
1o4b	P00523_SRC_CHICK_142_249	0.7278	0.8083
1o4g	P00523_SRC_CHICK_142_249	0.8333	0.8278
1o4f	P00523_SRC_CHICK_142_249	0.7833	0.825
1o4j	P00523_SRC_CHICK_142_249	0.8167	0.8111
1bkl	P00523_SRC_CHICK_142_249	0.8778	0.9306
1bkm	P00523_SRC_CHICK_142_249	0.9583	0.9639
2oiq	P00523_SRC_CHICK_249_533	0.9375	0.9542
1fmk	P00523_SRC_CHICK_249_533	0.775	0.7625
1yi6	P00523_SRC_CHICK_249_533	0.9917	0.9667
1yi6	P00523_SRC_CHICK_249_533	0.9	0.8792
1yoj	P00523_SRC_CHICK_249_533	0.9833	0.95
1yoj	P00523_SRC_CHICK_249_533	0.8625	0.775
2ptk	P00523_SRC_CHICK_249_533	0.9458	0.9667
2src	P00523_SRC_CHICK_249_533	0.9417	0.9208
1m14	P00533_EGFR_HUMAN_695_1022	0.93	0.93
2gs7	P00533_EGFR_HUMAN_695_1022	0.96	0.95
2gs7	P00533_EGFR_HUMAN_695_1022	0.99	0.97
1dp0	P00722_BGAL_ECOLI_2_1024	0.475	0.6125
1dp0	P00722_BGAL_ECOLI_2_1024	0.455	0.5575
1jz2	P00722_BGAL_ECOLI_2_1024	0.4475	0.565
1jz3	P00722_BGAL_ECOLI_2_1024	0.695	0.7425
1jz3	P00722_BGAL_ECOLI_2_1024	0.6225	0.695
1jz8	P00722_BGAL_ECOLI_2_1024	0.34	0.5825
1px3	P00722_BGAL_ECOLI_2_1024	0.6575	0.7075
1px3	P00722_BGAL_ECOLI_2_1024	0.7825	0.84
1qbv	P00734_THRB_HUMAN_364_622	0.9789	0.9763
1avg	P00735_THRB_BOVIN_367_521	0.8444	0.8278
1id5	P00735_THRB_BOVIN_367_521	1	0.9889
1avg	P00735_THRB_BOVIN_521_625	0.8444	0.8278
1id5	P00735_THRB_BOVIN_521_625	1	0.9889
1mkw	P00735_THRB_BOVIN_367_521	1	0.9591
1mkw	P00735_THRB_BOVIN_367_521	0.9045	0.9364
1mkx	P00735_THRB_BOVIN_367_521	0.9773	0.9682
1mkx	P00735_THRB_BOVIN_367_521	0.8045	0.8182
1tbr	P00735_THRB_BOVIN_367_521	0.9682	0.9455
1tbr	P00735_THRB_BOVIN_367_521	0.9182	0.9182
1ucy	P00735_THRB_BOVIN_367_521	0.9409	0.9636
2hnt	P00735_THRB_BOVIN_367_521	0.9364	0.9409
1mkw	P00735_THRB_BOVIN_521_625	1	0.9591
1mkw	P00735_THRB_BOVIN_521_625	0.9045	0.9364
1mkx	P00735_THRB_BOVIN_521_625	0.9773	0.9682
1mkx	P00735_THRB_BOVIN_521_625	0.8045	0.8182
1tbr	P00735_THRB_BOVIN_521_625	0.9682	0.9455
1tbr	P00735_THRB_BOVIN_521_625	0.9182	0.9182
1ucy	P00735_THRB_BOVIN_521_625	0.9409	0.9636
2hnt	P00735_THRB_BOVIN_521_625	0.9364	0.9409
1f0r	P00742_FA10_HUMAN_127_476	0.9778	0.9556
1lpk	P00742_FA10_HUMAN_127_476	0.9472	0.9944
1gj9	P00749_UROK_HUMAN_176_427	1	0.9868
1qb6	P00760_TRY1_BOVIN_63_243	1	0.9971
1o2u	P00760_TRY1_BOVIN_63_243	1	0.9912
1bjv	P00760_TRY1_BOVIN_63_243	1	0.9971
1amh	P00763_TRY2_RAT_23_246	0.7	0.715
1amh	P00763_TRY2_RAT_23_246	0.595	0.64
1brb	P00763_TRY2_RAT_23_246	0.535	0.56
1brc	P00763_TRY2_RAT_23_246	0.915	0.925
1co7	P00763_TRY2_RAT_23_246	0.82	0.9
1ezs	P00763_TRY2_RAT_23_246	0.63	0.655
1ezs	P00763_TRY2_RAT_23_246	0.685	0.665
1ezu	P00763_TRY2_RAT_23_246	0.515	0.465
1ezu	P00763_TRY2_RAT_23_246	0.78	0.865
1f5r	P00763_TRY2_RAT_23_246	0.69	0.635
1f7z	P00763_TRY2_RAT_23_246	0.94	0.92
1fy8	P00763_TRY2_RAT_23_246	0.81	0.745
1k9o	P00763_TRY2_RAT_23_246	0.815	0.955
