# Supplementary material for: Can the Energy Gap in the Protein-Ligand Binding Energy Landscape Be Used as a Descriptor in Virtual Ligand Screening?
Source: PLoS One. 2012 Oct 10;7(10):e46532. doi: 10.1371/journal.pone.0046532 (PMC3468575; doi:10.1371/journal.pone.0046532)
Supplement: Table S4 — Swiss-Prot IDs and performance of 40 protein domains included in the Pocketome benchmark. (XLS) [file pone.0046532.s004.xls]

## Sheet: Sheet1
Table S4. Swiss-Prot IDs and performance of 40 protein domains included in the Pocketome benchmark.
Swiss-Prot ID	AUC (Best docking score)	AUC (Energy gap)	P value
O02604_DRTS_PLAVI_1_238	0.7463	0.8537	0.000114789
O08782_ALD2_CRIGR_2_316	0.8375	0.7625	0.09869
O14757_CHK1_HUMAN_1_290	0.8687	0.8892	0
O14965_STK6_HUMAN_117_400	0.8722	0.9054	0
O15530_PDPK1_HUMAN_63_359	0.8216	0.8073	0
O24529_7OMT8_MEDSA_1_352	0.9125	0.9	0.02475
O31465_GLSA1_BACSU_1_327	0.8469	0.8578	0.00022044
O32449_PIP_SERMA_1_317	0.5521	0.6094	0.09415
O34453_NOSO_BACSU_1_336	0.8789	0.8924	0
O34667_LUXS_BACSU_1_157	0.6739	0.731	1.03688e-06
O43570_CAH12_HUMAN_29_291	0.9844	0.9875	8.45988e-07
O58843_ATGT_PYRHO_1_582	0.9681	0.9771	4.76527e-09
O60760_PTGD2_HUMAN_2_199	0.7291	0.7596	1.71413e-07
O64411_PAO_MAIZE_29_500	0.9738	0.9792	0
O66529_RISB_AQUAE_1_154	0.9339	0.9581	0
O75469_PXR_HUMAN_131_434	0.7479	0.7844	0.000311977
O75897_ST1C4_HUMAN_6_302	0.6333	0.625	0.14384
O76074_PDE5A_HUMAN_533_863	0.7136	0.7321	0
O81192_BPPS_SALOF_50_598	0.8013	0.9072	0
O96013_PAK4_HUMAN_293_591	0.802	0.87	0.00204
P00178_CP2B4_RABIT_22_491	0.7111	0.6722	0.15015
P00179_CP2C5_RABIT_20_487	0.9	0.9	0.02475
P00325_ADH1B_HUMAN_2_375	0.9555	0.9668	0
P00374_DYR_HUMAN_2_187	0.8976	0.9181	0
P00484_CAT3_ECOLX_1_213	0.4532	0.6403	0.01941
P00489_PYGM_RABIT_3_843	0.7247	0.7711	0
P00491_PNPH_HUMAN_1_289	0.8153	0.8611	0
P00502_GSTA1_RAT_2_222	0.9435	0.9598	0
P00523_SRC_CHICK_142_249	0.8854	0.8952	0
P00523_SRC_CHICK_249_533	0.9159	0.9122	0
P00533_EGFR_HUMAN_695_1022	0.9177	0.9289	0
P00722_BGAL_ECOLI_2_1024	0.517	0.63	0
P00734_THRB_HUMAN_364_622	0.9423	0.9481	0
P00735_THRB_BOVIN_367_521	0.9385	0.9474	0
P00735_THRB_BOVIN_521_625	0.9435	0.9493	0
P00742_FA10_HUMAN_127_476	0.9496	0.9604	0
P00749_UROK_HUMAN_176_427	0.9813	0.962	0
P00760_TRY1_BOVIN_63_243	0.9974	0.9903	0
P00763_TRY2_RAT_23_246	0.8284	0.8459	0
Q9Y6M4_KC1G3_HUMAN_33_362	0.9248	0.9372	1.59872e-14
