# Supplementary material for: Can the Energy Gap in the Protein-Ligand Binding Energy Landscape Be Used as a Descriptor in Virtual Ligand Screening?
Source: PLoS One. 2012 Oct 10;7(10):e46532. doi: 10.1371/journal.pone.0046532 (PMC3468575; doi:10.1371/journal.pone.0046532)
Supplement: Table S8 — Complete MRC VS DUD benchmark. (XLS) [file pone.0046532.s008.xls]

## Sheet: DUD_Statistics.csv
Table S8. Complete MRC VS DUD benchmark.
Protein Target Swiss-Prot ID	DUD Name	Conformers	Binders	Decoys	Total Ligands	Ratio Binders/Decoys	PDB IDs
P12821_ACE_HUMAN_643_1231	ace	9	49	1797	1846	0.027268	3bkk,1uze,3l3n,3bkl,1o86,2oc2,1uzf,2iul,2xy9
P04058_ACES_TORCA_22_560	ache	20	107	3892	3999	0.027492	1eve,1h22,1ut6,1e66,1odc,1zgb,1zgc,1dx6,1gpn,1w4l,1gpk,1u65,1gqr,2ack,1cfj,1qti,1vot,1ea5,1w6r,1h23
P56658_ADA_BOVIN_2_357	ada	13	39	927	966	0.042071	1wxy,1ndv,1v7a,1ndz,1v79,1ndw,1krm,1ndy,1o5r,1qxl,1uml,1vfl,2e1w
P15121_ALDR_HUMAN_1_316	alr2	19	26	995	1021	0.026131	1pwl,1t40,1el3,2nvc,1iei,1z3n,2ikj,1us0,2fzb,2i16,2iki,2pev,2nvd,1z89,1pwm,1x97,1x98,2agt,2ikg
P00811_AMPC_ECOLI_20_377	ampc	23	21	786	807	0.026718	1kvl,1kvl,1xgj,1xgi,1xgi,1l2s,2hds,2hds,2hdu,1c3b,1fcm,1fcn,1fco,1fsw,1fsy,1ga9,1i5q,1iel,1iem,1kds,1kdw,1ke0,1ke3
P10275_ANDR_HUMAN_666_919	ar	27	79	2854	2933	0.02768	2ax6,1z95,3b5r,3b66,3b67,3b68,2oz7,2pnu,1xnn,2hvc,3rlj,3rll,2ylo,1gs4,3b65,3g0w,2amb,2pip,2ihq,2ax7,2nw4,2ax9,2ax8,1i38,1xow,2axa,2q7k
P24941_CDK2_HUMAN_1_298	cdk2	20	72	2074	2146	0.034716	1ckp,1g5s,1h00,1h01,1ykr,2b54,2fvd,1h08,1oir,2b52,2b55,2bhh,1gij,1h1s,1ke7,1oiu,1pye,1r78,1urw,2c5y
P22734_COMT_RAT_44_264	comt	4	11	468	479	0.023504	1h1d,1jr4,2cl5,1vid
P00374_DYR_HUMAN_2_187	dhfr	20	410	8367	8777	0.049002	1s3u,1pd8,1mvs,1s3w,1boz,1kms,1kmv,1dlr,1dhf,1s3v,1pd9,1mvt,1u71,1dls,1drf,1hfp,1hfq,1hfr,1ohj,1ohk
P00533_EGFR_HUMAN_695_1022	egfr	4	475	15996	16471	0.029695	1m17,1m14,1xkk,2gs7
P03372_ESR1_AG_HUMAN_302_551	er_agonist	4	67	2570	2637	0.02607	2p15,1l2i,1zky,2fai
P03372_ESR1_ANT_HUMAN_302_551	er_antagonist	14	39	1448	1487	0.026934	2ouz,3ert,1uom,1sj0,1xp9,1xpc,1yim,1err,1xp1,1xp6,1xqc,2jfa,1yin,2ayr
P00742_FA10_HUMAN_127_476	fxa	20	146	5745	5891	0.025413	1nfu,1nfy,2j2u,2j34,2j38,1f0r,1f0s,1iqm,1xka,2cji,2d1j,2j94,2j95,2uwo,1lpk,1lpz,1nfw,2bok,2uwl,2uwp
P11362_FGFR1_HUMAN_456_765	fgfr1	4	120	4550	4670	0.026374	1agw,1fgi,1fgk,2fgi
P04150_GCR_HUMAN_504_777	gr	2	78	2947	3025	0.026468	1m2z,1nhz
P04035_HMDH_HUMAN_428_885	hmga	13	35	1480	1515	0.023649	1hwi,1hwi,1hwj,1hwl,1hwk,1dq8,1dqa,1hw8,1hw8,1hw9,2q1l,2q6b,2q6c
P07900_HS90A_HUMAN_3_235	hsp90	20	37	979	1016	0.037794	1uyf,1uye,2h55,1uyd,2byi,2fwy,2fwz,1uy6,1uyi,1uym,1yc1,2bsm,2uwd,1uyh,2bt0,2byh,2cdd,1uyc,1uyk,1uy9
P0A5Y6_INHA_MYCTU_1_269	inha	20	86	3266	3352	0.026332	2h7m,2h7n,2h7p,2b37,2h7l,2h7i,1eny,1p45,2aq8,2aqh,2aqi,2aqk,2b35,2h9i,2idz,2ie0,2ieb,2ied,2nsd,2ntj
P03176_KITH_HHV11_43_376	tk	20	22	891	913	0.024691	1ki4,1e2n,1e2k,1of1,1e2p,1e2m,1e2h,1e2l,1e2i,1e2j,1ki2,1ki3,1ki6,1ki7,1ki8,1kim,1p7c,1p7c,1qhi,2ki5
P08235_MCR_HUMAN_720_984	mr	11	15	636	651	0.023585	2aa2,2aax,2ab2,1ya3,1y9r,2aa7,2aa5,2a3i,2aa6,2abi,2oax
P47811_MK14_MOUSE_2_359	p38	19	454	9141	9595	0.049666	1w83,1yw2,2gtn,1wbn,2bal,2ghl,2gtm,1a9u,1m7q,1wbs,1wbt,1zz2,2baj,2ewa,2gfs,2ghm,1w82,1bl7,1wbv
P27907_NRAM_INBBE_76_465	na	12	49	1874	1923	0.026147	1b9v,1b9t,1b9s,1inf,1ivb,1a4g,1a4q,1inv,1nsb,1nsc,1nsd,1vcj
P26446_PARP1_CHICK_652_1011	parp	6	35	1351	1386	0.025907	1efy,2pax,1pax,1a26,2paw,3pax
O76074_PDE5A_HUMAN_533_863	pde5	12	88	1978	2066	0.044489	1xoz,2chm,1tbf,1uho,1rkp,1udt,1xp0,1t9r,2h42,1t9s,2h40,2h44
P05979_PGH1_SHEEP_23_594	cox1	3	25	911	936	0.027442	2ayl,1q4g,1eqg
Q05769_PGH2_MOUSE_16_569	cox2	2	426	13289	13715	0.032057	3pgh,1cvu
P55859_PNPH_BOVIN_1_287	pnp	19	50	1036	1086	0.048263	2ai2,1v48,1lv8,1a9p,1a9o,1lvu,1a9q,1a9r,1a9s,1a9t,1b8n,1b8o,1fxu,1pbn,1vfn,2ai1,2ai3,3pnp,4pnp
P03366_POL_HV1B1_599_815	hivrt	10	43	1519	1562	0.028308	2be2,1ep4,1s9e,1c1b,1c0u,1jla,1c1c,1tkt,1rt1,1rev
P06401_PRGR_HUMAN_676_933	pr	6	27	1041	1068	0.025937	1a28,2ovh,1sr7,1sqn,1zuc,2ovm
P08179_PUR3_ECOLI_1_212	gart	4	40	879	919	0.045506	1c3e,1c2t,1gar,2gar
P00489_PYGM_RABIT_3_843	gpb	20	52	2140	2192	0.024299	2iei,1c50,1wut,1wv0,1wv1,1z6p,1c8k,1c8l,1e1y,1wuy,2amv,2ieg,1z62,1uzu,1k06,2gm9,2gj4,1fu4,1xkx,1xl1
P19793_RXRA_HUMAN_221_462	rxr_alpha	12	20	750	770	0.026667	1rdt,1mvc,1xvp,1fm6,1k74,1fm9,1g1u,1g5y,1g5y,2p1t,2p1u,2p1v
P12931_SRC_HUMAN_252_536	src	8	159	6319	6478	0.025162	2bdf,2bdj,1yol,1y57,2h8h,2src,1yi6,1yoj
P00734_THRB_HUMAN_364_622	thrombin	20	72	2456	2528	0.029316	1ktt,1k22,1mu6,2bxt,2jh0,1bhx,1d4p,1g32,1mu8,1mue,1o5g,1qbv,1t4u,1tom,1zgi,2a2x,2feq,2fes,2jh5,2jh6
P00760_TRY1_BOVIN_63_243	trypsin	20	49	1664	1713	0.029447	1f0t,1v2o,1y59,1y5a,1y5b,1y5u,1k1p,1qb6,1g36,1o2r,1o2u,1qbn,1v2n,1k1l,1mtw,1o2t,1az8,1bjv,1f0u,1gj6
P35968_VGFR2_HUMAN_810_1171	vegfr2	8	88	2906	2994	0.030282	2p2i,1y6a,2p2h,1y6b,1vr2,1ywn,2oh4,2qu6

## Sheet: Decoys
Target	PDB ID	PID_1	Status_1	PID_2	Status_2
P04058_ACES_TORCA_22_560	1dx6	20868	done
P04058_ACES_TORCA_22_560	1gpn	20869	done
P04058_ACES_TORCA_22_560	1w4l	20870	done
P04058_ACES_TORCA_22_560	1gpk	20871	done
P04058_ACES_TORCA_22_560	1u65	20872	done
P04058_ACES_TORCA_22_560	1gqr	20873	done
P04058_ACES_TORCA_22_560	2ack	20874	done
P04058_ACES_TORCA_22_560	1cfj	20875	done
P04058_ACES_TORCA_22_560	1qti	20876	done
P04058_ACES_TORCA_22_560	1vot	20877	done
P04058_ACES_TORCA_22_560	1ea5	20878	done
P04058_ACES_TORCA_22_560	1w6r	20879	done
P04058_ACES_TORCA_22_560	1h23	20880	done
P00374_DYR_HUMAN_2_187	1s3v	20881	done
P00374_DYR_HUMAN_2_187	1mvt	20882	done
P00374_DYR_HUMAN_2_187	1u71	20883	done
P00374_DYR_HUMAN_2_187	1dls	20884	done
P00374_DYR_HUMAN_2_187	1drf	20885	done
P00374_DYR_HUMAN_2_187	1hfp	20886	done
P00374_DYR_HUMAN_2_187	1hfq	20887	done
P00374_DYR_HUMAN_2_187	1hfr	20888	done
P00374_DYR_HUMAN_2_187	1ohj	20889	done
P00374_DYR_HUMAN_2_187	1ohk	20890	done
P00533_EGFR_HUMAN_695_1022	2itn	20891	done
P00533_EGFR_HUMAN_695_1022	2itv	20892	done
P00742_FA10_HUMAN_127_476	1f0s	20893	done
P00742_FA10_HUMAN_127_476	1iqm	20894	done
P00742_FA10_HUMAN_127_476	1xka	20895	crushed	20934	done
P00742_FA10_HUMAN_127_476	2cji	20896	done
P00742_FA10_HUMAN_127_476	2d1j	20897	done
P00742_FA10_HUMAN_127_476	2j94	20898	done
P00742_FA10_HUMAN_127_476	2j95	20899	crushed	20936	crushed	20937	crushed
P00742_FA10_HUMAN_127_476	2uwo	20900	done
P00742_FA10_HUMAN_127_476	1lpk	20901	done
P00742_FA10_HUMAN_127_476	1lpz	20902	done
P00742_FA10_HUMAN_127_476	1nfw	20903	done
P00742_FA10_HUMAN_127_476	2bok	20904	done
P00742_FA10_HUMAN_127_476	2uwl	20905	crushed	20935	done
P00742_FA10_HUMAN_127_476	2uwp	20906	done
P47811_MK14_MOUSE_2_359	1m7q	20907	done
P47811_MK14_MOUSE_2_359	1wbs	20908	done
P47811_MK14_MOUSE_2_359	1wbt	20909	done
P47811_MK14_MOUSE_2_359	1zz2	20910	done
P47811_MK14_MOUSE_2_359	2baj	20911	done
P47811_MK14_MOUSE_2_359	2ewa	20912	done
P47811_MK14_MOUSE_2_359	2gfs	20913	done
P47811_MK14_MOUSE_2_359	2ghm	20914	done
P47811_MK14_MOUSE_2_359	1w82	20915	done
P47811_MK14_MOUSE_2_359	1bl7	20916	done
P47811_MK14_MOUSE_2_359	1wbv	20917	done
P00489_PYGM_RABIT_3_843	2ieg	20918	done
P00489_PYGM_RABIT_3_843	1z62	20919	done
P00489_PYGM_RABIT_3_843	1uzu	20920	done
P00489_PYGM_RABIT_3_843	1k06	20921	done
P00489_PYGM_RABIT_3_843	2gm9	20922	done
P00489_PYGM_RABIT_3_843	2gj4	20923	done
P00489_PYGM_RABIT_3_843	1fu4	20924	done
P00489_PYGM_RABIT_3_843	1xkx	20925	done
P00489_PYGM_RABIT_3_843	1xl1	20926	done
P00734_THRB_HUMAN_364_622	1tom	20927	done
P00734_THRB_HUMAN_364_622	1zgi	20928	done
P00734_THRB_HUMAN_364_622	2a2x	20929	done
P00734_THRB_HUMAN_364_622	2feq	20930	done
P00734_THRB_HUMAN_364_622	2fes	20931	done
P00734_THRB_HUMAN_364_622	2jh5	20932	done
P00734_THRB_HUMAN_364_622	2jh6	20933	done

## Sheet: Decoys1
Target	PDB ID	PID_1	Status_1	PID_2	Status_2
P15121_ALDR_HUMAN_1_316	2iki	20968	done
P00811_AMPC_ECOLI_20_377	1xgiA	20969	done
P00811_AMPC_ECOLI_20_377	1xgjA	20987	done
P10275_ANDR_HUMAN_666_919	2nw4	20973	done
P10275_ANDR_HUMAN_666_919	2ax9	20974	done
P10275_ANDR_HUMAN_666_919	1i38	20975	done
P00742_FA10_HUMAN_127_476	1nfu	20976	done
P00742_FA10_HUMAN_127_476	2j95	20977	done
P04035_HMDH_HUMAN_428_885	2q1l	20978	done
P00734_THRB_HUMAN_364_622	2jh0	20979	done
P00734_THRB_HUMAN_364_622	1bhx	20980	done
P00760_TRY1_BOVIN_63_243	1f0t	20981	done
P15121_ALDR_HUMAN_1_316	2ikjA	20989	done
